# Supplementary material for: Emulsifiers-free lubrication process using natural oils dispersions in non-aqueous solvents for leather
Source: Royal Society of Chemistry journal article supplement (doi:10.1039/c5ra12170a), 2015-01-01
Supplement: c5ra12170a1.pdf [file c5ra12170a1.pdf]

## Supporting information

**Table S1.** Recipe for lubrication of leather with oil dispersions

| Process        | Chemical offer (% w/w of leather)                                  | Time (min)                                                          | Condition/ Remarks                                                                                                                             |
|----------------|--------------------------------------------------------------------|---------------------------------------------------------------------|------------------------------------------------------------------------------------------------------------------------------------------------|
| Washing        | Water (100%)                                                       | 5                                                                   | Same as practiced commercially                                                                                                                 |
| Neutralization | Water (100%)<br>Sodium formate (1%)<br>Sodium bicarbonate (1.5%)   | 10<br>split into 3 equal feeds at 5 min interval followed by 30 min | Same as practiced commercially<br>pH at cross-section – 5.0 – 5.5                                                                              |
| Washing        | Water (100%)                                                       | 5                                                                   | Same as practiced commercially                                                                                                                 |
| Fatliquoring   | Solvent / solvent mixture (200%)<br>Oil – solvent dispersion (10%) | 45                                                                  | Modified to suit this work. Conventional process uses 100-200% water and commercial fatliquor (sulfited/sulfonated etc. oils with emulsifiers) |
| Fixing         | Formic acid (1%)                                                   | split into 3 equal feeds at 5 min interval followed by 30 min       | Same as practiced commercially<br>pH 3.8-4.0                                                                                                   |

**Characterization of oils.** The oils used for the present study were evaluated for acid value and saponification values, determined as per standard procedure.<sup>1</sup> The measurements were performed in triplicate. The results were reproducible within limits of experimental error and the average of the results reported.

**Table S2.** Acid value and saponification value for CO, CSO and FO employed in this study

| <b>oil</b> | <b>Acid value (mg KOH/g)</b> | <b>Saponification value (mg KOH/g)</b> |
|------------|------------------------------|----------------------------------------|
| CO         | 2                            | 183                                    |
| CSO        | 1.7                          | 197                                    |
| FO         | 44                           | 210                                    |

**Table S3.** Kinematic viscosity ( $\nu$ ), cSt of CO, CSO and FO in different solvents, Temp., 25 °C

| <b>CO</b>                            | <b>Kinematic viscosity (<math>\nu</math>), cSt</b> |               | <b>CSO</b>                           | <b>Kinematic viscosity (<math>\nu</math>), cSt</b> |                 | <b>FO</b>                            | <b>Kinematic viscosity (<math>\nu</math>), cSt</b> |        |
|--------------------------------------|----------------------------------------------------|---------------|--------------------------------------|----------------------------------------------------|-----------------|--------------------------------------|----------------------------------------------------|--------|
| Solvent volume fraction ( $\phi_s$ ) | CO-IPA                                             | CO-H:EA (9:1) | Solvent volume fraction ( $\phi_s$ ) | CSO-Hep                                            | CSO-H:IPA (1:9) | Solvent volume fraction ( $\phi_s$ ) | FO-IPA                                             | FO-EA  |
| 0.95106                              | 3.492                                              | 0.730         | 0.949                                | 0.705                                              | 2.366           | 0.955                                | 3.567                                              | 0.696  |
| 0.90668                              | 4.2001                                             | 0.902         | 0.903                                | 0.821                                              | 2.695           | 0.914                                | 4.518                                              | 0.906  |
| 0.76408                              | 8.052                                              | 2.469         | 0.756                                | 1.501                                              | 4.282           | 0.781                                | 9.362                                              | 2.516  |
| 0.66024                              | 13.455                                             | 4.976         | 0.651                                | 2.316                                              | 6.130           | 0.682                                | 13.959                                             | 4.139  |
| 0.54844                              | 22.391                                             | 10.288        | 0.538                                | 3.844                                              | 8.922           | 0.573                                | 20.960                                             | 6.5449 |

**Table S4.** Viscosity values for neat solvents and their mixtures employed in this study

| <b>Solvent/Solvent mixture</b> | <b>Viscosity (cPs)</b> |
|--------------------------------|------------------------|
|                                | <b>@ 20°C</b>          |
| EA                             | 0.45                   |
| Hep                            | 0.42                   |
| IPA                            | 2.4                    |
| Hep:EA (0.1:0.9)               | 0.47                   |
| Hep:EA (0.9: 0.1)              | 0.42                   |
| Hep:IPA (0.9:0.1)              | 0.54                   |
| Hep:IPA (0.1:0.9)              | 1.7                    |

#### REFERENCES

1. I.S.I, *Handbook of Food Analysis*. 17<sup>th</sup> ed.; 1984.
